# Supplementary material for: Investigation of Dendriplexes by Ion Mobility-Mass Spectrometry
Source: MDPI journal article supplement (doi:10.3390/molecules191220731), 2014-12-12

# Supplementary Materials

**Figure S1.** Carbon labelling of (A)  $\phi_3\text{G0(N)}$ , (B)  $\text{G0.5(N)}$  and (C)  $\text{Phe}_3\text{G1(N)}$ .

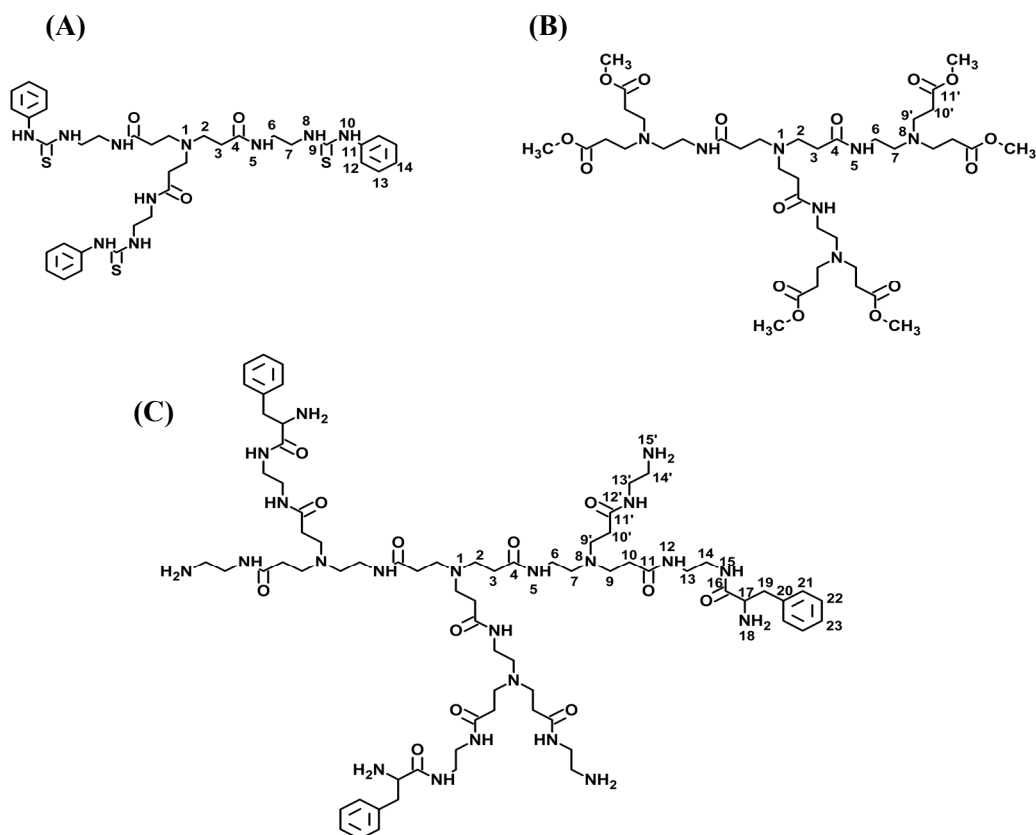

**Figure S2.** Positive ion ESI-MS/MS mass spectrum of  $[\phi_3\text{G0(N)}+\text{H}]^+$  and the corresponding fragmentation pattern.

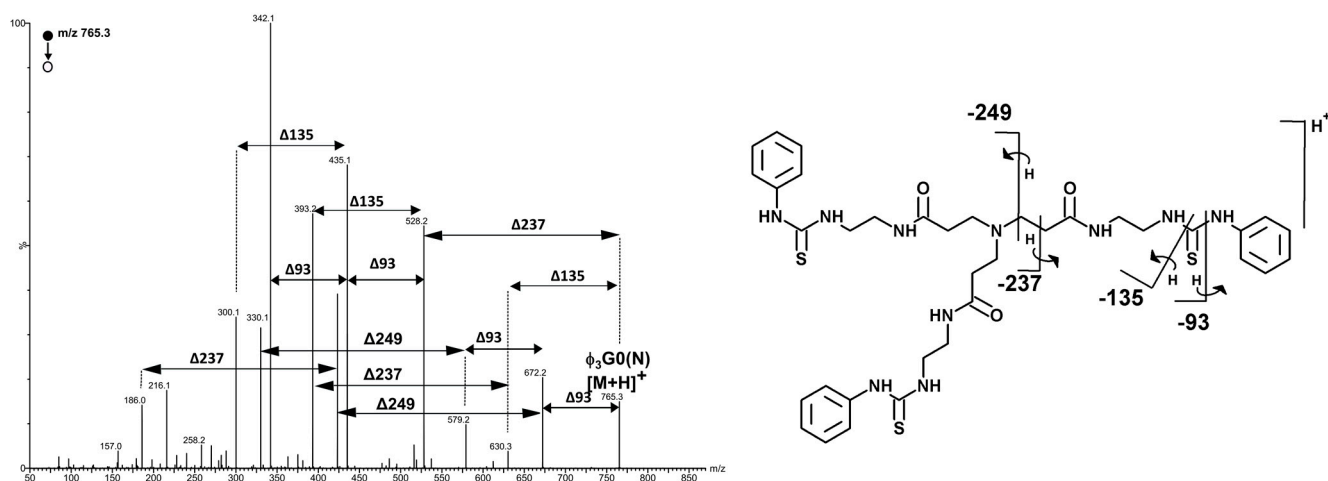

**Figure S3.** ESI-MS/MS mass spectrum Phe<sub>2</sub>G1(N) (A) and the corresponding fragmentation pattern (B).

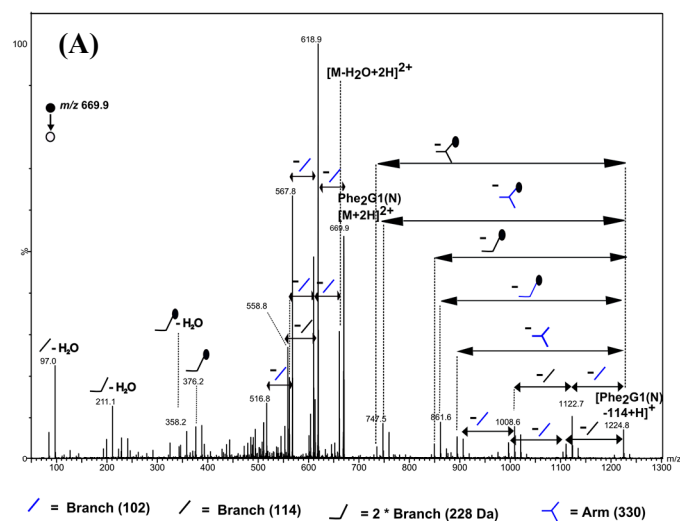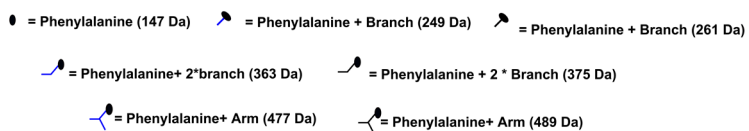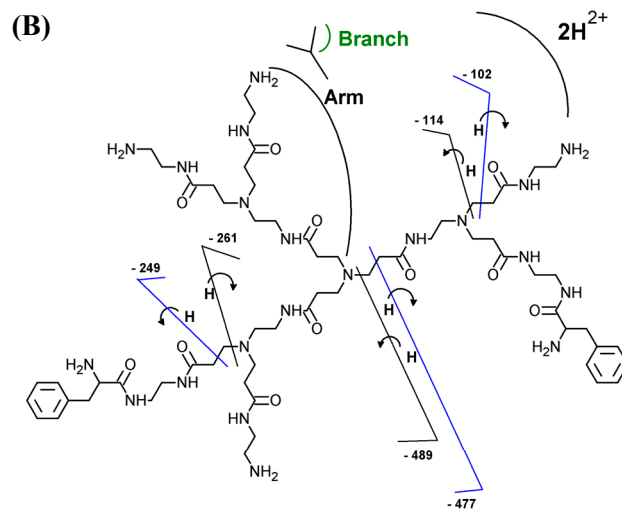

Supplement: s1 [file s1]
